# Supplementary material for: Neuropathic MORC2 mutations perturb GHKL ATPase dimerization dynamics and epigenetic silencing by multiple structural mechanisms
Source: PubMed Central journal article supplement (PMC5811534; doi:10.1038/s41467-018-03045-x), 2018-02-13
Supplement: 41467_2018_3045_MOESM1_ESM.pdf [file 41467_2018_3045_MOESM1_ESM.pdf]

Neuropathic MORC2 mutations perturb GHKL ATPase dimerization dynamics and epigenetic silencing by multiple structural mechanisms

Douse *et al.*

**Supplementary Information**

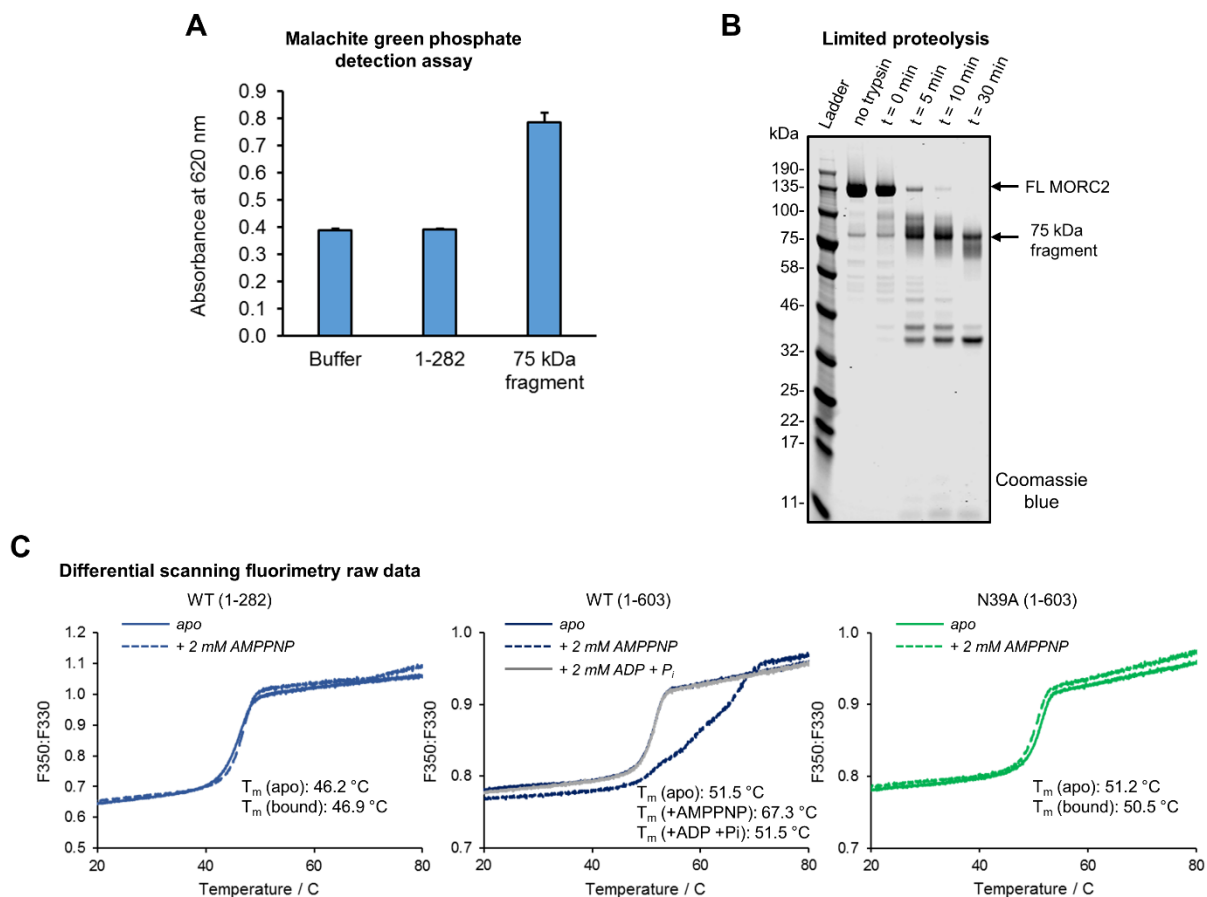

**Supplementary Figure 1.** Identification, characterization and purification of a MORC2 N-terminal fragment with ATPase activity

(A) Endpoint Malachite green ATPase assay (based on chromogenic detection of evolved phosphate) with different MORC2 constructs. MORC2(1-282) had no detectable activity, while the 75-kDa fragment isolated from degraded full-length material showed evidence of activity. Error bars represent standard deviation between three measurements.

(B) Coomassie-stained SDS-PAGE gel following limited tryptic proteolysis with 10  $\mu$ g of purified full-length MORC2.

(C) The nano-differential scanning fluorimetry (DSF) thermal unfolding profiles of wild-type MORC2(1-282), (1-603) and N39A MORC2(1-603) in the absence and presence of ligands as marked. See also Fig. 1B.

### MORC2 (1-603) variants: size exclusion chromatograms

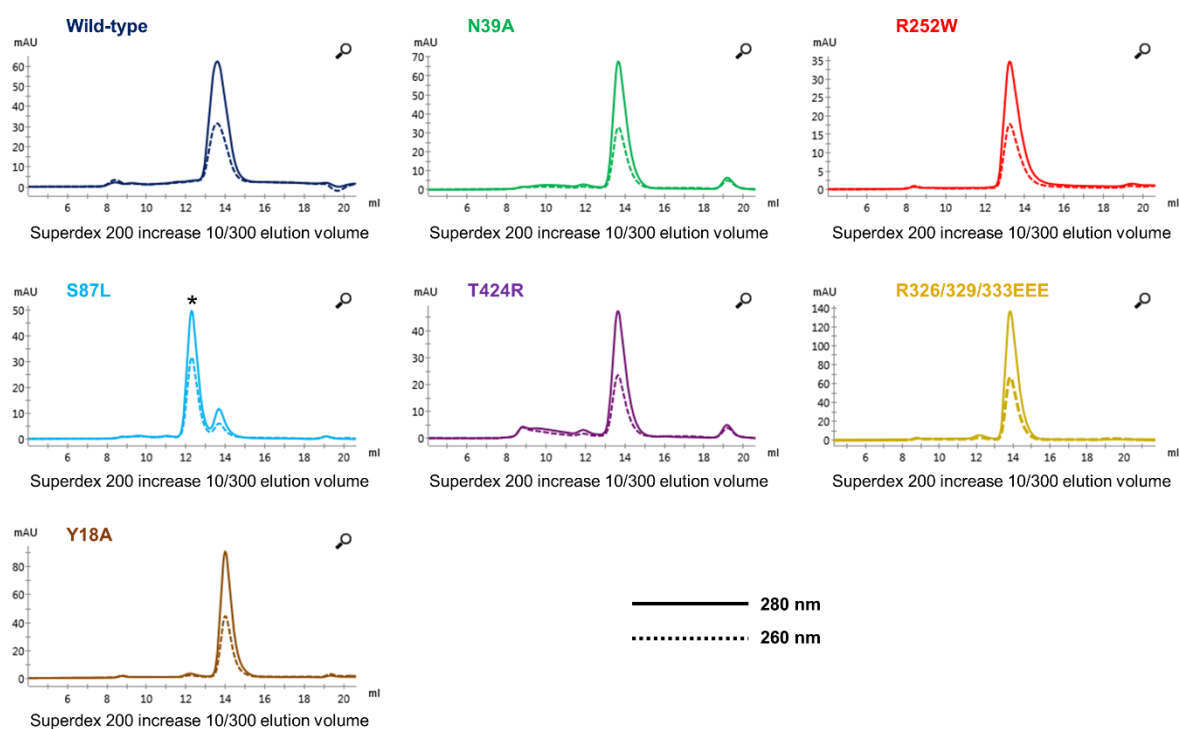

**Supplementary Figure 2.** Size exclusion chromatograms for all MORC2(1-603) variants reported in this paper. Solid and dashed lines indicate absorbance at 280 nm and 260 nm, respectively. Elution volumes of ~14 mL are consistent with monomeric protein, confirmed for several variants by MALS (see also Figs. 1C, 2F and 5C). In the S87L trace, the asterisk marks the species that elutes early which we assign as a nucleotide-bound dimer. Chromatography was performed with a S200 increase (10/300) column (GE Healthcare).

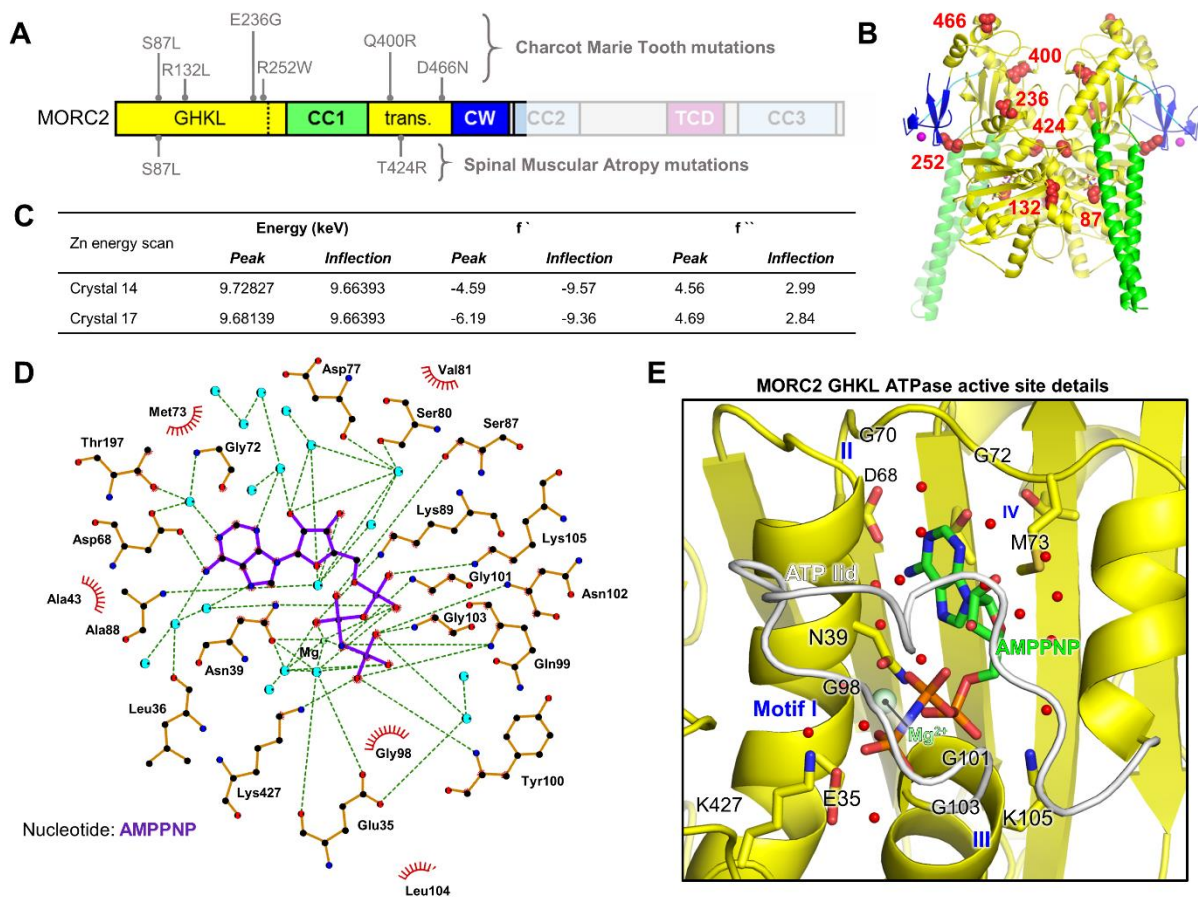

**Supplementary Figure 3.** Supporting details related to the crystal structure of the MORC2(1-603)-AMPPNP homodimeric complex.

(A and B) Positions of neuropathic (CMT- and SMA-associated) point mutations on the MORC2 domain structure (A), and 3D structure (B). The side chains of mutated residues are shown as red spheres.

(C) X-ray fluorescence spectra have absorption peaks at energies near the theoretical zinc *K* absorption edge (inflection point 9.6586 keV), indicating that zinc is bound in two MORC2(1-603)-AMPPNP crystals tested (Crystals 14 and 17).

(D and E) Details of the GHKL-type ATPase active site of MORC2. The recognition of the non-hydrolysable ATP analogue AMPPNP is shown schematically (D), and in 3D to illustrate the four motifs specific to the GHKL family (E). Water molecules are shown as blue circles in (D) and as red spheres in (E).

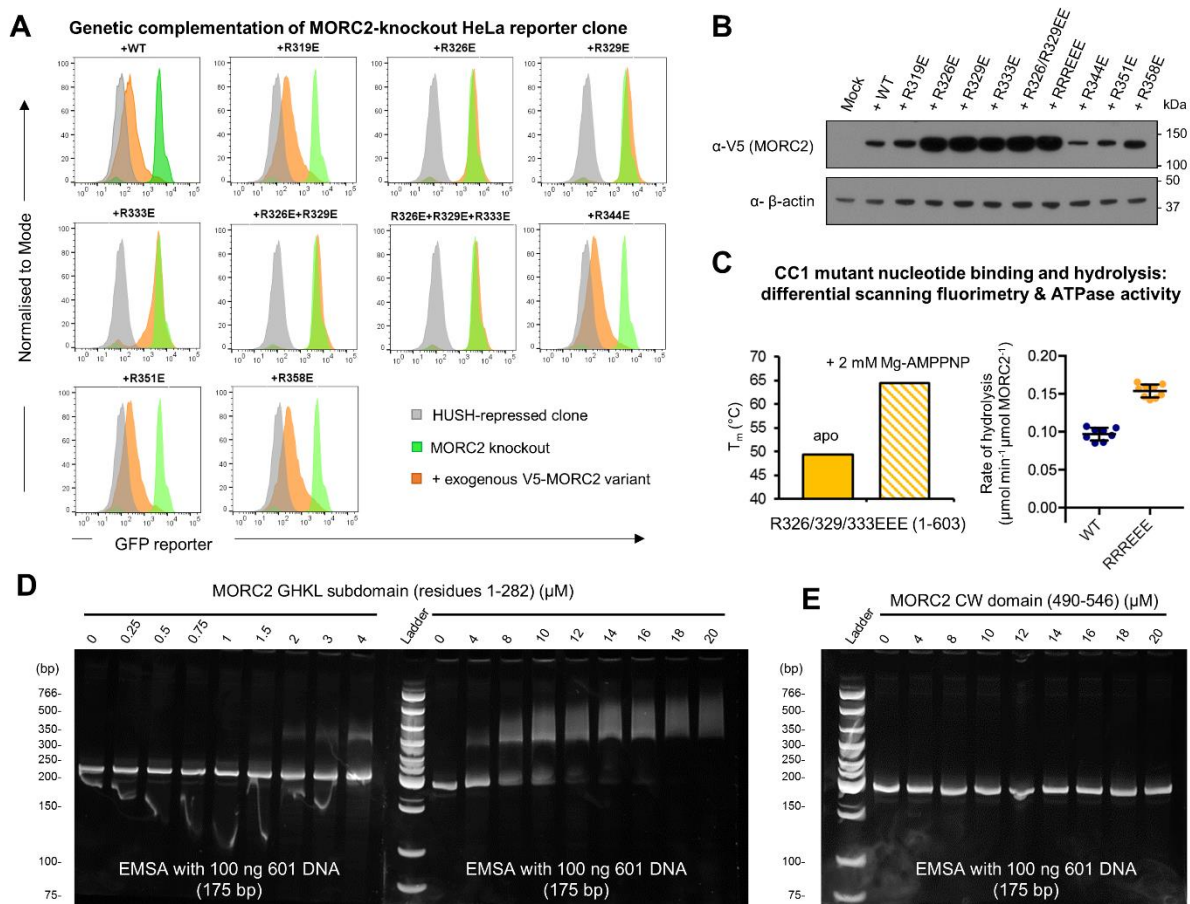

**Supplementary Figure 4. Functional importance and DNA binding of CC1 and other MORC2 domains.**

(A and B) FACS plots of genetic complementation assays to assess HUSH-dependent silencing of CC1 charge reversal mutants. Shown are the data from Day 12 post-transduction: in grey is the GFP reporter fluorescence of the repressed clone; in green is the MORC2 knockout; in orange is the MORC2 knockout transduced with exogenous MORC2 variants (A). The lentiviral vector used expresses mCherry from an internal ribosome entry site (IRES), enabling control of viral titre by mCherry fluorescence measurement. A Western blot of cell lysates (B) shows that despite using the same MOI the inactive MORC2 variants were expressed at higher concentrations than WT.

(C) The triple CC1 mutant R326/329/333EEE is folded and an active ATPase according to DSF (left) and ATPase (right) assays. Quoted  $T_m$  values are an average of two technical replicates; note that the deviation between measurements was  $<0.2$  °C in all cases. For the ATPase assay, error bars represent standard deviation between measurements;  $n=8$  (WT),  $n=9$  (RRREEE). The WT data are as shown in Fig. 1D.

(D and E) EMSAs with 100 ng 601 DNA in the presence of increasing concentrations of MORC2 GHKL domain (D) or CW domain (E). Gels were post-stained for DNA with SYBR Gold. Note that in (D), the samples were run in two different gels, stained and scanned next to each other. The 0  $\mu$ M and 4  $\mu$ M protein samples were run in both gels as an internal control.

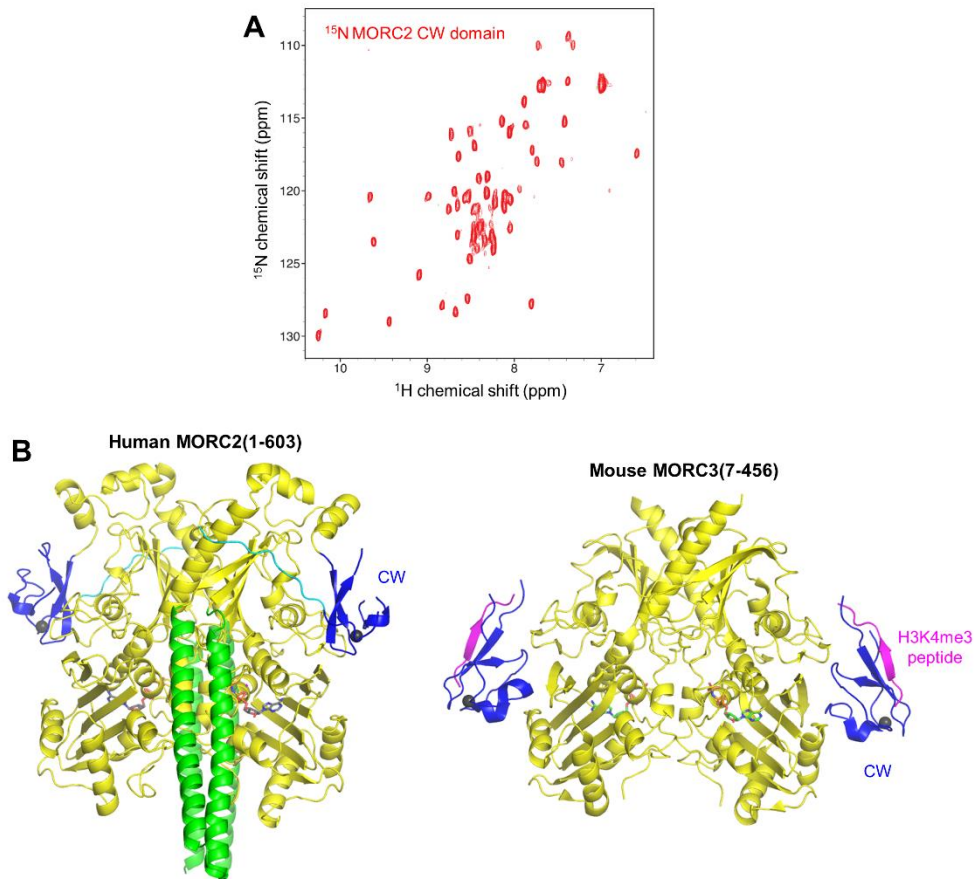

**Supplementary Figure 5.** Supporting details concerning the structure and function of the MORC2 CW domain.

(A) The MORC2 CW domain does not require the ATPase domain for folding. The <sup>1</sup>H, <sup>15</sup>N-HSQC spectrum of isolated <sup>15</sup>N-labelled MORC2 CW domain (residues 490-546) at pH 7.5 and 298 K shows amide chemical shift dispersion consistent with a folded domain.

(B) Comparison of the overall human MORC2 and mouse MORC3 ATPase-CW structures (cartoon representation, with nucleotides shown in stick representation and metal ions shown as space-filling spheres) shows the different position of the MORC2 CW domain as compared to MORC3, relative to the ATPase module. Domains making up the ATPase modules are in yellow, CW domains in blue, CC1 in green (MORC2 only), H3K4me3 peptide in pink (MORC3 only).

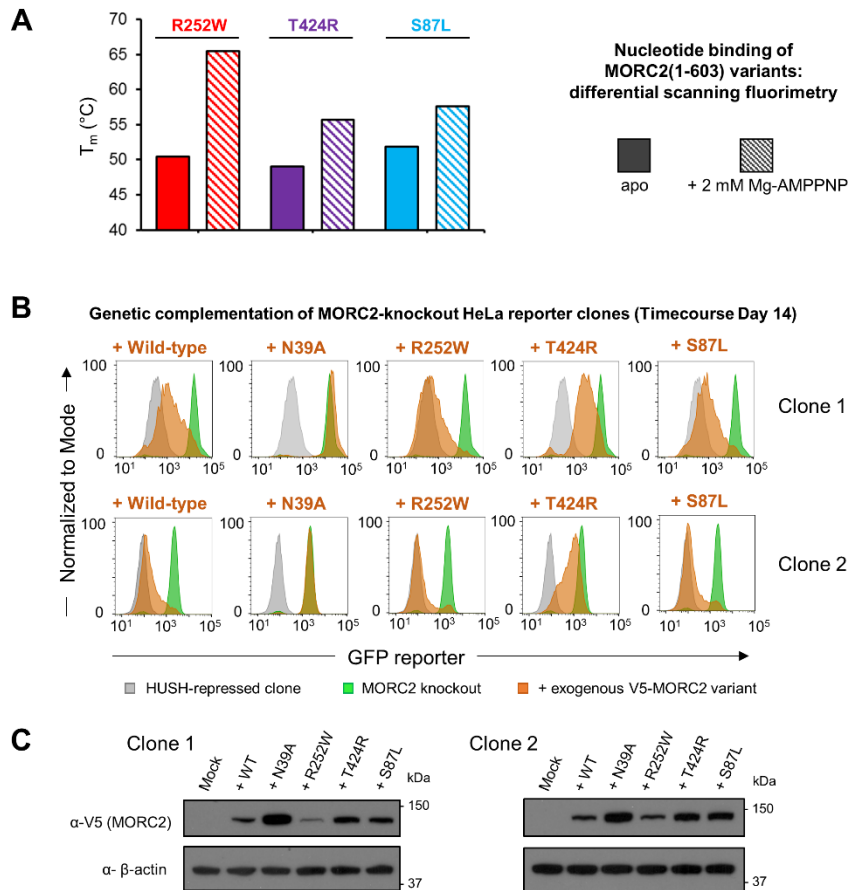

**Supplementary Figure 6.** Nucleotide binding and HUSH-dependent silencing activities of neuropathic variants of MORC2.

(A) Summary of nano-differential scanning fluorimetry (DSF) data with different MORC2(1-603) disease variants in the absence (solid bar) and presence (striped bar) of 2 mM Mg-AMPPNP. The neuropathic mutations studied here do not cause unfolding of the ATPase module and all variants showed substantial thermal stabilization in the presence of AMPPNP. Quoted  $T_m$  values are an average of at least two MORC replicates; note that the deviation between measurements was  $<0.2$  °C in all cases.

(B) Example FACS plots from the timecourse complementation experiments in two different clones, shown in Fig. 5b. Shown are the data from Day 14 post-transduction: the GFP reporter fluorescence of the HUSH-repressed clone is in grey; the MORC2 knockout is in green; the MORC2 knockout transduced with exogenous MORC2 variants is in orange.

(C) Western blot validation of expression of the exogenous MORC2 variants in each MORC-knockout reporter clone.

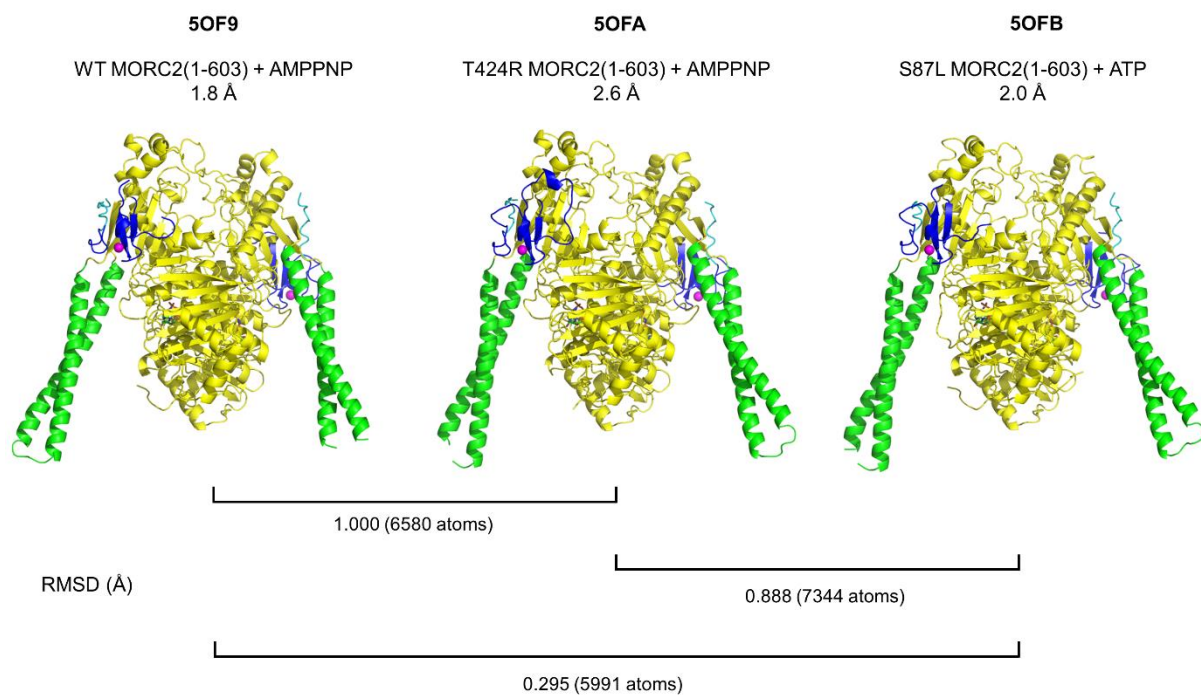

**Supplementary Figure 7.** Comparison of the overall structures of MORC2(1-603) variants reported in this paper. Root mean square deviations (RMSDs) for all atoms in each structure pair are listed.



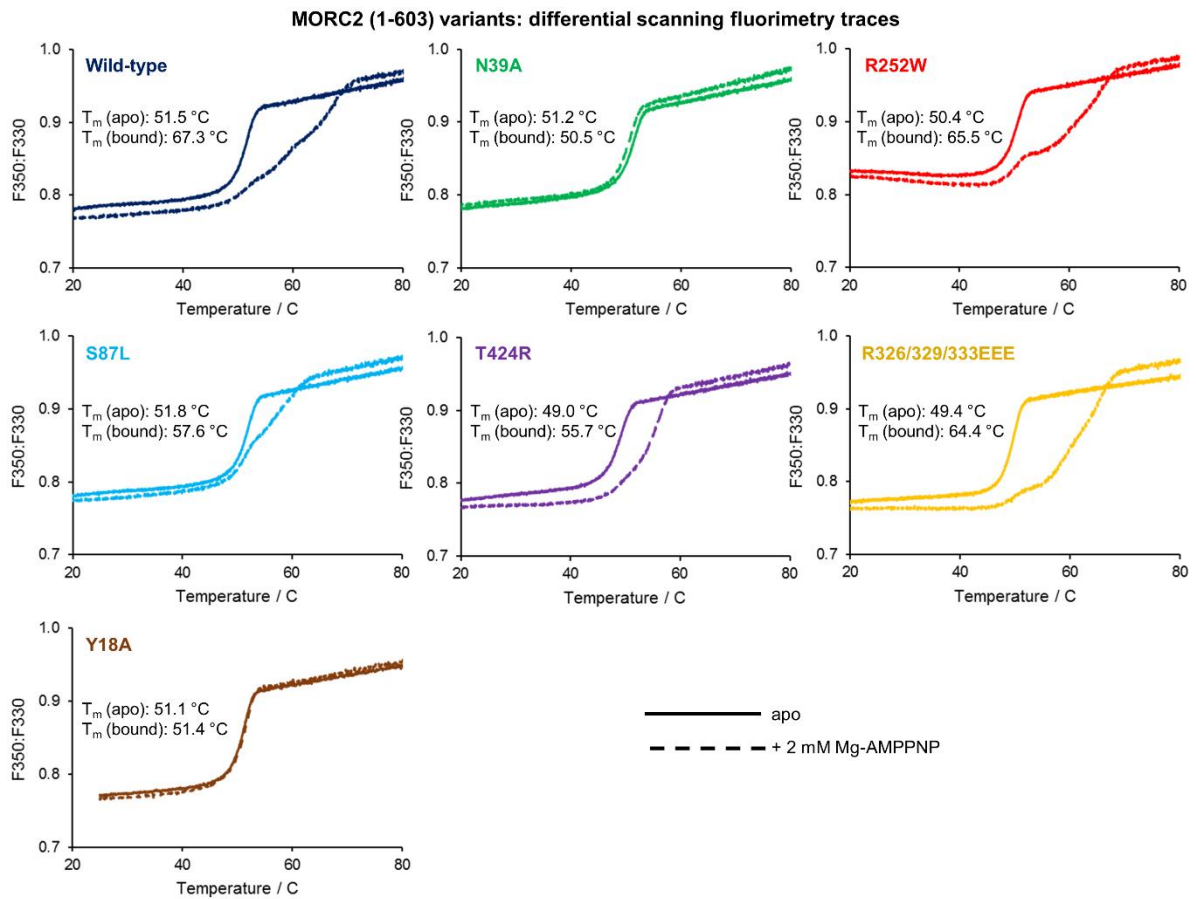

**Supplementary Figure 8.** The nano-differential scanning fluorimetry (DSF) thermal unfolding profiles of all MORC2(1-603) variants reported in this paper (5  $\mu$ M), in the absence (solid line) and presence (dashed line) of 2 mM Mg-AMPPNP. The fitted  $T_m$  values are shown.

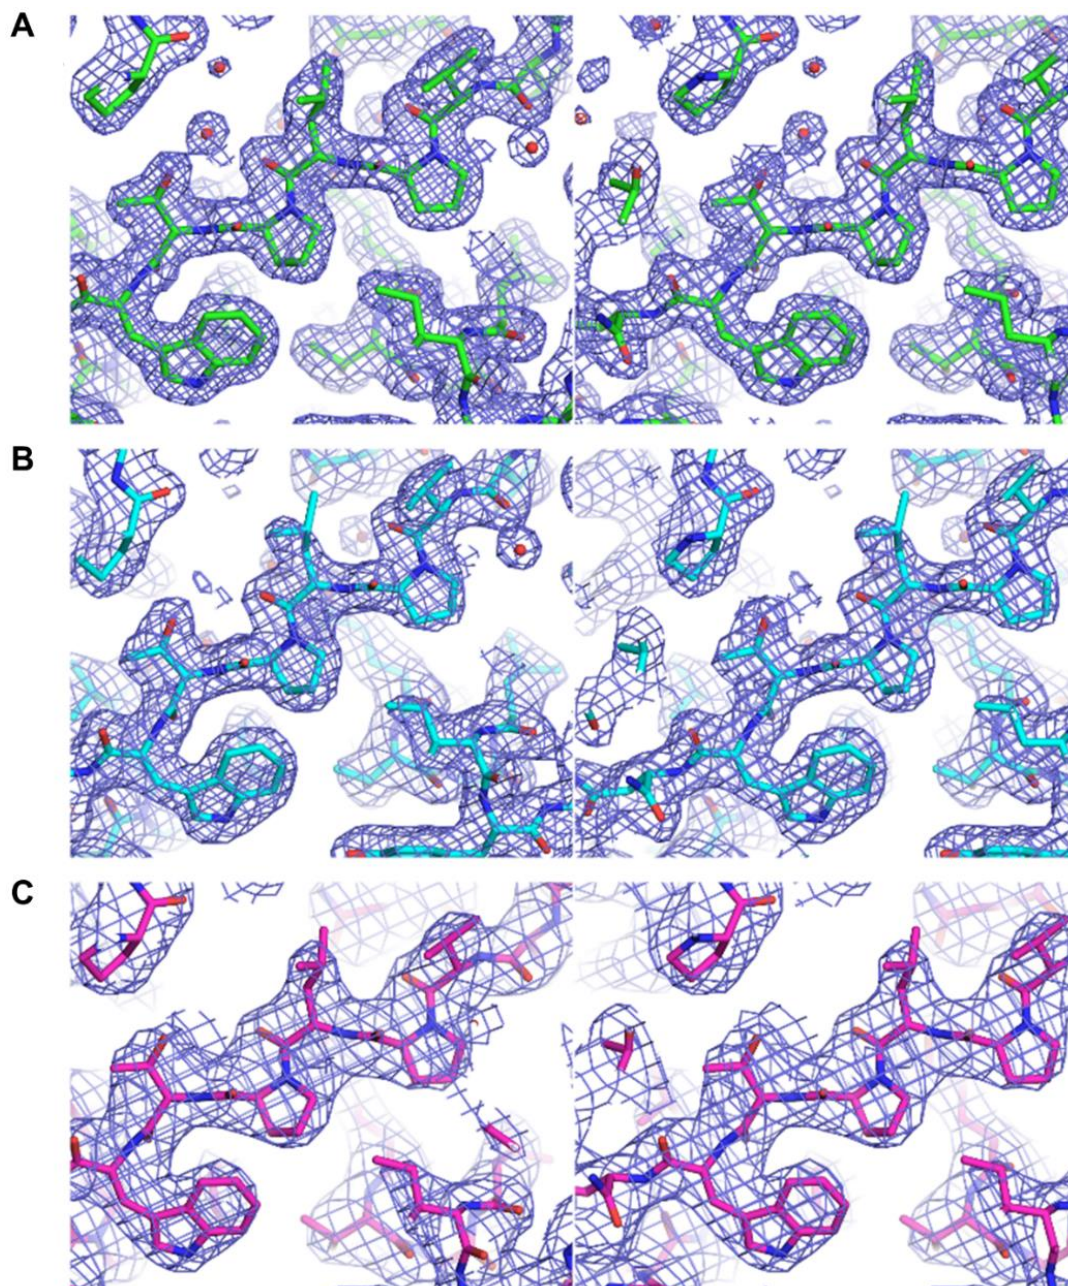

**Supplementary Figure 9.** Stereo images of  $2F_{\text{obs}} - F_{\text{calc}}$  electron density maps for portions of the three crystal structures reported in this paper. Maps were calculated using the refined coordinates of wild-type (A, green), S87L (B, cyan) and T424R (C, purple) MORC2 variants. All three maps are contoured at  $1\sigma$ .

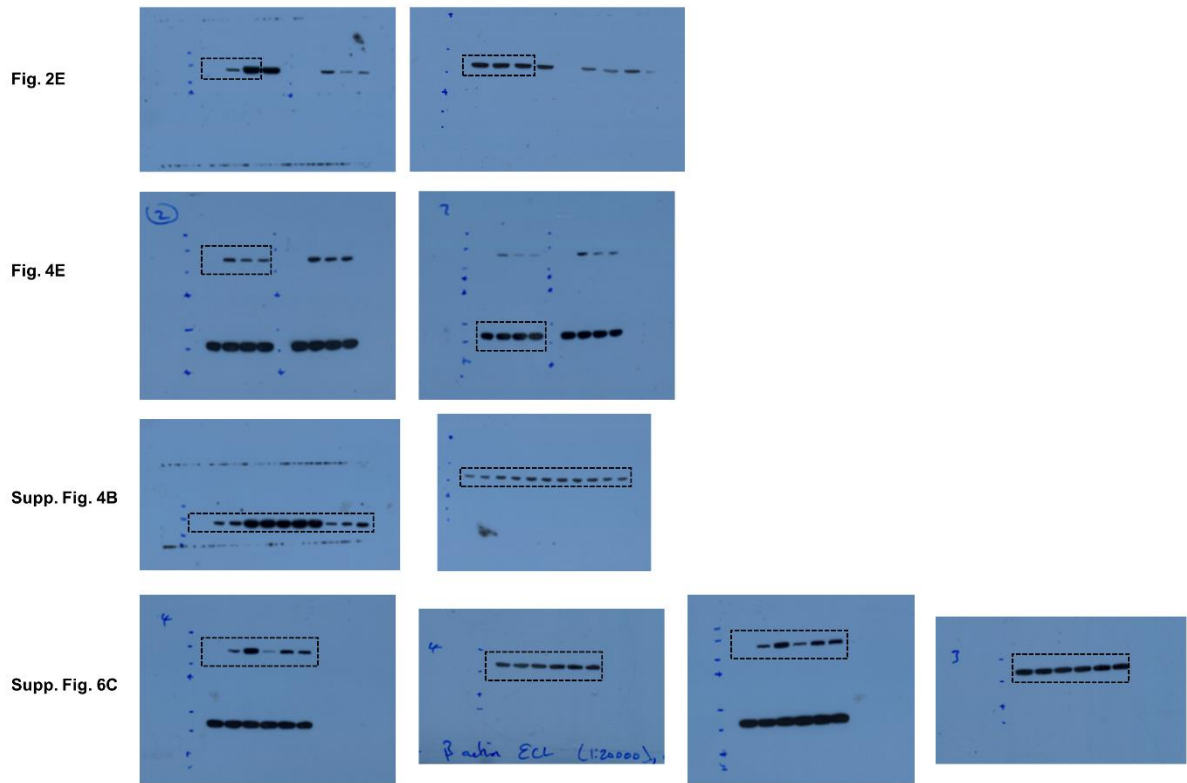

**Supplementary Figure 10.** Uncropped Western blot images.

**Supplementary Table 1. Oligonucleotide sequences**

|                   | Sequence (5' to 3')                                      |
|-------------------|----------------------------------------------------------|
| MORC2_N_f         | ATGGCTTTCACAAATTACAGCAGTCT                               |
| MORC2_C_r         | TCAGTCCCCCTTGGTGATGAG                                    |
| MORC2-603_r       | TCAAGTGGAAAGGTCTGGTGGT                                   |
| N39A_f            | ACTGGTTGATGCTGCAAGAGATGCTGATGCCACCAG                     |
| N39A_r            | CATCTCTTGCAGCATCAACCAGTTCAGCAAGGGCAC                     |
| S87L_f            | GTTTGGGAAGTTGGCCAAGCGAACACCTGAGTCTAC                     |
| S87L_r            | TTCGCTTGGCCAACTTCCCAAACCTGGATCACACTG                     |
| T424R_f           | CCTGGAGCCTAGGCACAACAAACAGGACTTTGC                        |
| T424R_r           | GTTTGTGTGCCTAGGCTCCAGGACCAGGTAGG                         |
| Y18A_f            | GCTAACCTTTGAAGCTCTGCACACAAATTCAACCACTC                   |
| Y18A_r            | TTGTGTGCAGAGCTTCAAAGGTTAGCTGAGCTCG                       |
| R326329333EEE_f   | GAGACCTCACGGAGGACTCCGAGGTGATGTTGGAACAGGTCCAGAACAGAGCCATC |
| R326329333EEE_r   | CTGGACCTGTTCCAACATCACCTCGGAGTCTCCGTGAGGTCTCCACCTAGGCG    |
| R266A_f           | CAGACCAAGGCGCTCTCCTGCTGCCTGTACAAGCCCA                    |
| R266A_r           | CAGGAGAGCGCCTTGGTCTGCACCTTGTGCCCATG                      |
| R319E_f           | GACATTAGAAGTAGAGCTAGGTGGAGACCTC                          |
| R319E_r           | GAGGTCTCCACCTAGCTCTACTTCTAATGTC                          |
| R326E_f           | GGTGGAGACCTCACGGAGGACTCCAGGGTGATG                        |
| R326E_r           | CATCACCTGGAGTCTCCTCCGTGAGGTCTCCACC                       |
| R329E_f           | CTCACGCGGGACTCCGAGGTGATGTTGCGACAG                        |
| R329E_r           | CTGTGCAACATCACCTCGGAGTCCCAGGTGAG                         |
| R333E_f           | TCCAGGGTGATGTTGGAGCAGGTCCAGAACAGA                        |
| R333E_r           | TCTGTTCTGGACCTGCTCCAACATCACCTGGA                         |
| R326329EE_f       | GGTGGAGACCTCACGGAGGACTCCGAGGTGATGTTGCGACAG               |
| R326329EE_r       | CTGTGCAACATCACCTCGGAGTCTCCGTGAGGTCTCCACC                 |
| R344E_f           | GCCATCACTCTGCGCGAAGAAGCCGATGTCAA                         |
| R344E_r           | TTGACATCGGCTTCTTCCGCGCAGAGTGATGGC                        |
| R351E_f           | GCCGATGTCAAGAAGGAGATCAAGGAGGCCAAG                        |
| R351E_r           | CTTGGCCTCCTTGATCTCCTTCTTGACATCGGC                        |
| R358E_f           | AAGGAGGCCAAGCAGGAAGCACTTAAAGAACCT                        |
| R358E_r           | AGGTTCTTTAAGTGCTTCTGCTTGGCCTCCTT                         |
| <b>Sequencing</b> |                                                          |
| pOET_f            | CAAATAATATCACAACTGGAAATGTCTATC                           |
| pOET_r            | TACAACAATTGTCTGTAATCAACAACGC                             |
| SFFV_f            | TGCTTCTCGCTTCTATTCCG                                     |
| WPRE_r            | CCACATAGCGTAAAAGGAGC                                     |
| M2-seq1           | GATGAAGTGATAGTCCCCTG                                     |
| M2-seq2           | GCGAGCACTTAAAGAACCTAAGG                                  |
| M2-seq3           | GCAGGAGAAGCTGGAGGCCCTTC                                  |
| MORC2seq579       | GGACAGCGGAACATTGGTG                                      |
| MORC2seq1236      | GGTTGTTGATGTGCCCTACC                                     |
| MORC2seq1896      | GCCAACCTAGACCAGCCA                                       |
